# Supplementary material for: Short- and long-term outcomes of patients with minor stroke and nonvalvular atrial fibrillation
Source: BMC Neurol. 2023 Nov 20;23:410. doi: 10.1186/s12883-023-03457-3 (PMC10658860; doi:10.1186/s12883-023-03457-3)
Supplement: Supplementary file 1 — Supplementary Material 1 [file 12883_2023_3457_MOESM1_ESM.docx]

**Title Page**

Short- and Long-Term Outcomes of Patients with Minor Stroke and Nonvalvular Atrial Fibrillation

Chunmiao Duan, PhD1,2,3*; Shang Wang, MD, PhD4*; Yunyun Xiong, MD, PhD1,2,5; Hong qiu Gu, PhD2,6; Kaixuan Yang, PhD2,6; Xing-Quan Zhao, MD, PhD1,2; Xia Meng, MD, PhD2; Yongjun Wang, MD, PhD1,2,6,7

1Vascular Neurology, Department of Neurology, Beijing Tiantan Hospital, Capital Medical University, Beijing, China

2China National Clinical Research Center for Neurological Diseases, Beijing, China

3Department of Neurology, Beijing Daxing Teaching Hospital, Capital Medical University, Beijing, China

4Neurocardiology Center, Department of Neurology, Beijing Tiantan Hospital, Capital Medical University, Beijing, China

5Chinese Institute for Brain Research, Beijing, China

6National Center for Healthcare Quality Management in Neurological Diseases, Beijing, China

7Center for Stroke, Beijing Institute for Brain Disorders, Beijing, China

*Chunmiao Duan and Shang Wang contributed equally.

**Supplementary material**

**Supplementary Figure 1. Kaplan-Meier curve for the recurrent stroke and death**

**
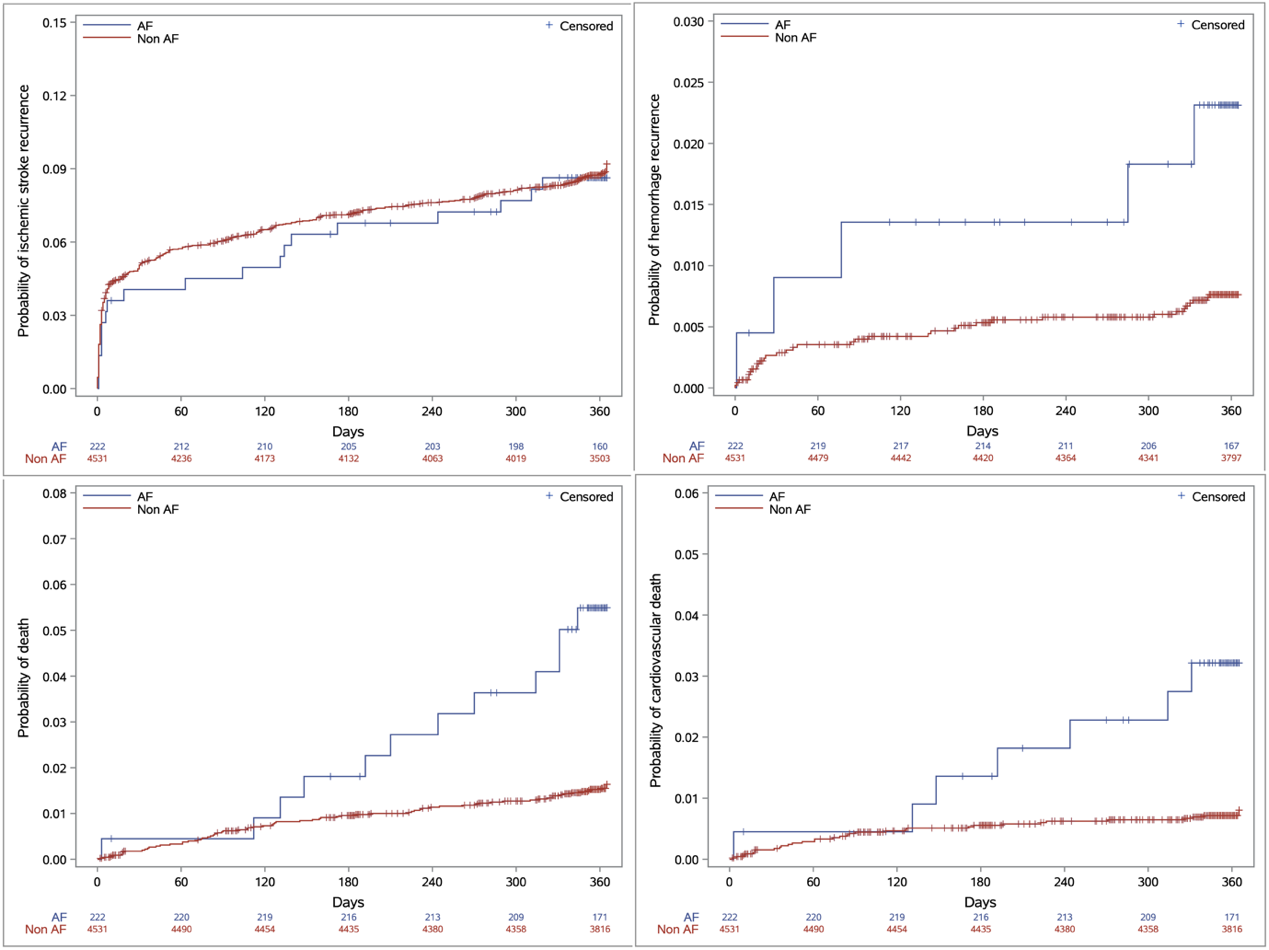
**
